# Supplementary material for: Timing of Elective Repeat Cesarean Delivery at Term and Neonatal Outcomes
Source: Atypon-hosted journal article supplement (doi:10.1056/nejmoa0803267), 2009-01-07
Supplement: nejm_tita_111sa1.pdf [file nejm_tita_111sa1.pdf]

## Supplementary Appendix

This appendix has been provided by the authors to give readers additional information about their work.

Supplement to: Tita ATN, Landon MB, Spong CY, et al. Timing of elective repeat cesarean delivery at term and neonatal outcomes. *N Engl J Med* 2009;360:111-20.

1 **Supplementary web table:** Crude prevalence, adjusted odds ratio (95% CI) of the primary outcome by  
 2 predictor variables included in multivariable logistic regression model

| Variable             | Crude Prevalence<br>of Primary Outcome | Adjusted OR | 95% Confidence Interval |
|----------------------|----------------------------------------|-------------|-------------------------|
| Maternal age*        | 9.5 (1262/13258)                       | 1.01        | 1.00, 1.02              |
| Race or Ethnicity    |                                        |             |                         |
| Black                | 19.5 (2584/13258)                      | 1.6         | 1.4, 1.9                |
| White                | 46.7 (6185/13258)                      | 1.0         | Referent                |
| Hispanic             | 29.2 (3875/13258)                      | 0.9         | 0.8, 1.1                |
| Others‡              | 4.6 (614/13258)                        | 1.2         | 0.9, 1.6                |
| Married              | 67.4 (8936/13257)                      | 0.9         | 0.8, 1.0                |
| Unmarried/Unknown    | 33.6 (4321/13257)                      | 1.0         | Referent                |
| Payor                |                                        |             |                         |
| Medicaid§            | 48.5 (6435/13255)                      | 1.5         | 1.2, 1.7                |
| Private              | 51.5 (6820/13255)                      | 1.0         | Referent                |
| Smoker               | 11.5 (1528/13251)                      | 1.1         | 0.9, 1.3                |
| Non-smoker           | 88.5 (11723/13251)                     | 1.0         | Referent                |
| Prior cesareans      |                                        |             |                         |
| 1                    | 62.5 (8282/13258)                      | 1.0         | Referent                |
| 2                    | 29.4 (3898/13258)                      | 1.0         | 0.9, 1.1                |
| 3 or more            | 8.1 (1078/13258)                       | 1.4         | 1.1, 1.7                |
| Diabetes (A1 only)** | 5.2 (692/13256)                        | 1.5         | 1.2, 1.9                |
| No diabetes          | 94.8 (12564/13256)                     | 1.0         | Referent                |

3 \*Maternal age is included as a continuous variable in the regression model; the crude prevalence is the overall mean

4 ‡"Others" race or ethnic category includes Asians, Native Americans and other ethnicities.

5 §Medicaid coverage includes both those with Medicaid or no insurance coverage.

6 \*\*Only women with Class A1 (diet-controlled gestational) or those without any diabetes mellitus are included in the study
